# Supplementary material
Source: HighWire-hosted journal article supplement (https://www.cmaj.ca/highwire/filestream/59049/field_highwire_adjunct_files/0/enjoy-steptoe-1-at.pdf)
Supplement: enjoy-steptoe-1-at.pdf [file enjoy-steptoe-1-at.pdf]

## **Appendix 1 (as supplied by the authors): activities of daily living**

1. Dressing, including putting on shoes and socks
2. Walk across a room
3. Bathing or showering
4. Eating, such as cutting up food
5. Getting in or out of bed
6. Using the toilet, including getting up or down
